# Supplementary material
Source: Springer Nature journal article supplement (https://www.springermedizin.de/resource/supplementary/12969_2010_423_MOESM8_ESM.pdf/9593016)

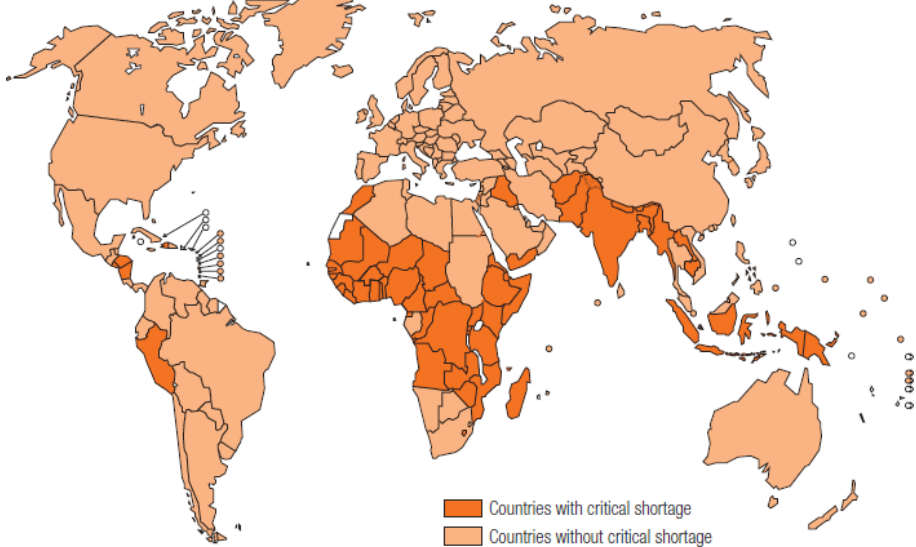

Supplement: MOESM8 [file 9593016]
